# Supplementary material
Source: publisher figshare collection journal article supplement (https://gsapubs.figshare.com/ndownloader/files/23303225)
Supplement: Supplementary file 1 [file 23303225]

**DR1: Extent of bathymetry data and sub-bottom data used in this study**

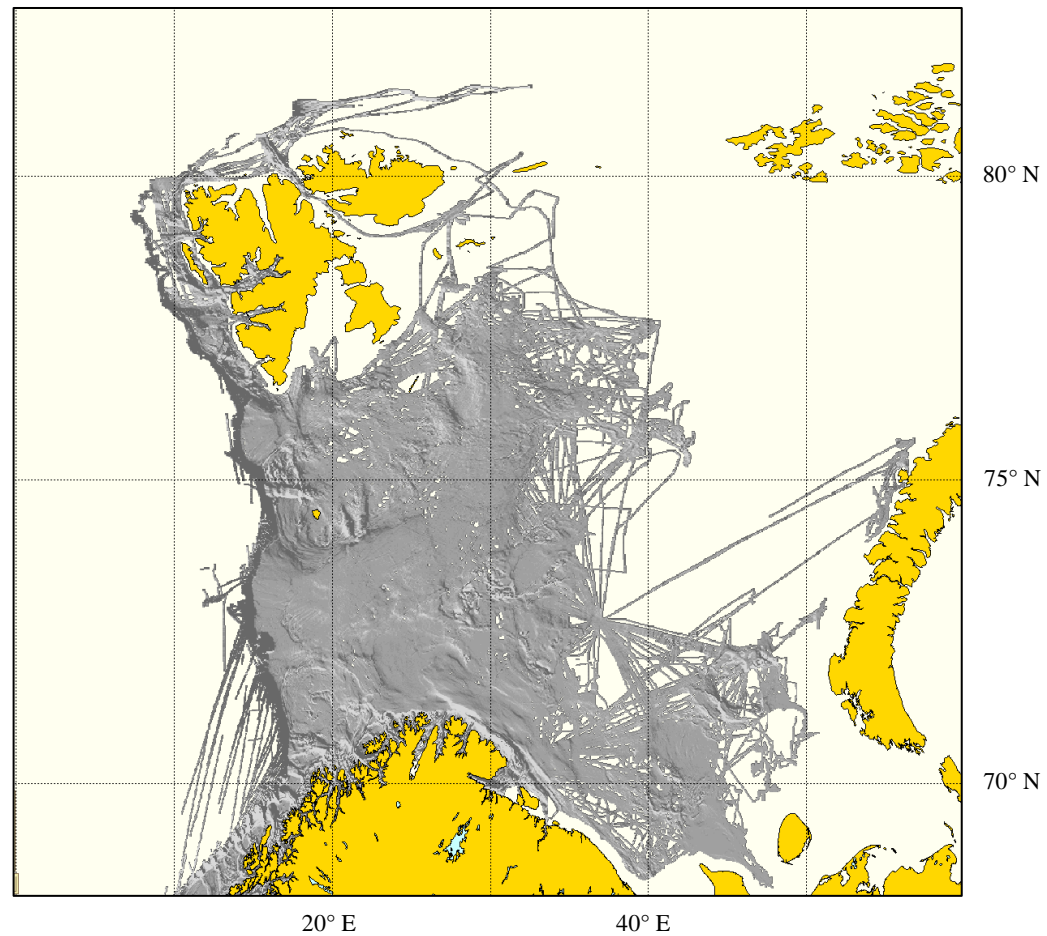

**Figure DR1-A)** Screenshot from the Olex fisheries database showing the extent of Olex bathymetry data used in this study (for technical details see nr. 1 in Table DR2).

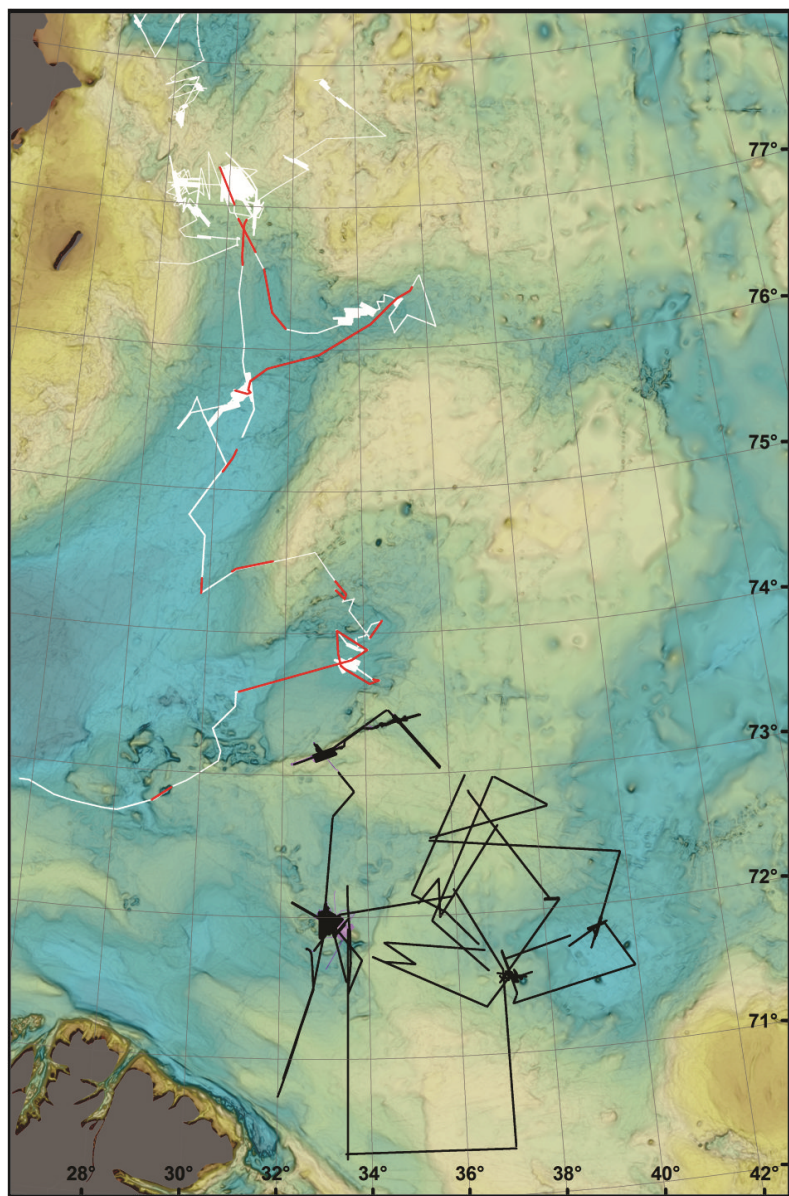

**DR1-B)** White area: Extent of multibeam swath bathymetry and chirp sub-bottom profiler data acquired on R/V Helmer Hanssen (for technical details see nr. 2, 4, 5 in Table DR2); Red lines: Extent of single-channel seismic acquired on R/V Helmer Hanssen (for technical details see nr. 5 in Table DR2); Black lines: Extent of multibeam swath bathymetry and sub-bottom profiler data acquired on R/V Akademik Strakhov (for details see nr. 3, 6 in Table DR2)

**DR2: Description of bathymetry data and sub-bottom data used in this study** (*For the extent of the respective datasets see DR1*):

| Nr. | Data type        |                           | Description                                                                                                                              | Horizontal resolution                                                                                                                                                            | Further information                                                                                                                                                                                                                                                                                                                                   |
|-----|------------------|---------------------------|------------------------------------------------------------------------------------------------------------------------------------------|----------------------------------------------------------------------------------------------------------------------------------------------------------------------------------|-------------------------------------------------------------------------------------------------------------------------------------------------------------------------------------------------------------------------------------------------------------------------------------------------------------------------------------------------------|
| 1   | Echosounder data | Olex database             | Olex fisheries database: Compilation of primarily single-channel echosounder data                                                        | The Olex seafloor image has a cell size of 5x5 m, a positional accuracy of <10m, vertical resolution of ~0.1-1 m, and a horizontal resolution of 5 m up to a few tens of metres. | www.olex.no<br>Bradwell, T., Stoker, M. S., Golledge, N. R., Wilson, C. K., Merritt, J. W., Long, D., Everest, J. D., Hestvik, O. B., Stevenson, A. G., Hubbard, A. L., Finlayson, A. G., and Mathers, H. E., 2008: The northern sector of the last British Ice Sheet: Maximum extent and demise: Earth-Sciences Reviews, v. 88, no. 3-4, p. 207-226. |
| 2   | Echosounder data | Multi-beam echosounder    | Simrad EM-300, 135 beams, 63° by 63° beam configuration and automatic continuous pinging. Calibrated by CTD profiles (Seabird 911).      | Frequency: 30 kHz<br>Gridded to: 10 x 10 m.                                                                                                                                      | Acquired on R/V Helmer Hanssen by the University of Tromsø in 2012. Used for groundtruthing of mapped features.                                                                                                                                                                                                                                       |
| 3   | Echosounder data | Multi-beam echosounder    | Reson SeaBat 8111/7150 101 beams, 150° swath                                                                                             | Frequency: 100 kHz<br>Gridded to: 10 x 10 m.                                                                                                                                     | Acquired Akademik Strakhov in 2011 (TTR18 cruise). Used for groundtruthing of mapped features.                                                                                                                                                                                                                                                        |
| 4   | Sub-bottom data  | Chirp sub-bottom profiler | Edgetech HM-3300, 16 element transducer, signal length: 40 m                                                                             | Frequency: sweeping 1.5-9 kHz.<br>Max. observed penetration: <40 ms.                                                                                                             | Acquired on R/V Helmer Hanssen by the University of Tromsø in 2012. Used for groundtruthing of mapped features.                                                                                                                                                                                                                                       |
| 5   | Sub-bottom data  | High resolution seismic   | Single-channel seismic system: 15/15 GI-airgun (shot rate 3 s), 6 m long 20-element streamer, BOGE Compair Reavell compressor (160 Bar). | Frequency: 0-800 Hz rec.<br>Max observed penetration: 850 ms                                                                                                                     | Acquired on R/V Helmer Hanssen by the University of Tromsø in 2012. Used for groundtruthing of mapped features.                                                                                                                                                                                                                                       |
| 6   | Sub-bottom data  | Chirp sub-bottom profiler | Edgetech HM-3300, 5 x 5 transducer.                                                                                                      | Frequency range: 2-16 kHz<br>Beam width: 20°.                                                                                                                                    | Acquired on R/V Akademik Strakhov in 2011 (TTR18 cruise). Used for groundtruthing of mapped features.                                                                                                                                                                                                                                                 |

### DR3: Shapefile containing geographical information and attribute descriptions for the mapped tunnel valleys

The file: *DR3\_TVsBARSEA.shp* is a shapefile for use with geographic information systems (GIS). The following six files collectively make up the shapefile: *DR3\_TVsBARSEA.shp*, *DR3\_TVsBARSEA.shx*, *DR3\_TVsBARSEA.dbf*, *DR3\_TVsBARSEA.prj*, *DR3\_TVsBARSEA.sbn* and *DR3\_TVsBARSEA.sbx*.

The file contains information about the mapped tunnel valleys (TVs) as well as selected attributes of these features. The file is compatible with a number of commercial programs (e.g. Esri's ArcMap), and freeware (e.g. Qgis). Shapefile projection: WGS84UTM36N.

The table shown below contains the names of the given feature attributes (top line, bold font) which are included in the shapefile *DR3PTVsBARSEA.shp*, as well as a brief description of the what the values describe and how they were measured.

| <b>FID</b>           | <b>Shape</b>                                   | <b>type</b>                                                                                                                                                                                                                                                                                                                                          | <b>length2D</b>                                                                                                                   | <b>depth</b>                                                                                                                          | <b>depth_max</b>                                                                                                                 | <b>width_min</b>                                                                                                                       | <b>width_max</b>                                                                                                                    | <b>innerwidth</b>                                                                                                                                             | <b>innerdepth</b>                                                                                                                                                   |
|----------------------|------------------------------------------------|------------------------------------------------------------------------------------------------------------------------------------------------------------------------------------------------------------------------------------------------------------------------------------------------------------------------------------------------------|-----------------------------------------------------------------------------------------------------------------------------------|---------------------------------------------------------------------------------------------------------------------------------------|----------------------------------------------------------------------------------------------------------------------------------|----------------------------------------------------------------------------------------------------------------------------------------|-------------------------------------------------------------------------------------------------------------------------------------|---------------------------------------------------------------------------------------------------------------------------------------------------------------|---------------------------------------------------------------------------------------------------------------------------------------------------------------------|
| Feature ID<br>Ex.: 1 | Shapefile<br>type<br><br>Ex:<br>Polyline<br>ZM | Type 0: Features mapped based on extensive Olex data, often verified by multibeam bathymetry data and/or seismic data. Mapping of features of type 0 is considered to be robust.<br><br>Type 1: Unverified channel segments. Features mapped based on less extensive Olex data. Mapped extent of features considered more uncertain than for Type 0. | Feature length ( <i>as the crow flies</i> ).<br>Distance (in m) from the starting point of polyline to the end point of polyline. | Depth of the main part of the channel/valley feature (in m).<br><br>Depth was measured from shoulder height to channel/valley bottom. | Depth of the deepest part of the depression feature (in m).<br><br>Depth was measured from shoulder height to depression bottom. | Depression widths were measured from shoulder to shoulder.<br><br>Width of the narrowest section of the channel/valley feature (in m). | Depression widths were measured from shoulder to shoulder.<br><br>Width of the widest section of the channel/valley feature (in m). | Given for features that have cross profiles with wide shoulders sitting atop a narrower channel. A value (in m) showing the width of the narrower depression. | Given for features that contain a narrower, deeper channel within the main channel/valley feature. A value (in m) showing the depth of the narrower channel/valley. |
